# Supplementary material
Source: publisher site journal article supplement (https://www.dovepress.com/article/340745)
Supplement: Supplementary file 1 [file get_supplementary_file.php]

Supplementary materials：

Supplementary Table 1. the types of emergency surgery

| Procedure | Infected group  (n=271) | Non-infected group  (n=614) |
| --- | --- | --- |
| Cholecystectomy | 23 | 97 |
| Colectomy | 66 | 166 |
| Proctectomy | 51 | 113 |
| Small-bowel procedures | 97 | 174 |
| Ventral hernia repair | 34 | 64 |

Supplementary Figure 1. Heat map of AUCs for diagnostic comparisons of all composite biomarkers
